# Supplementary material for: Rational policymaking during a pandemic
Source: PubMed Central journal article supplement — Proc Natl Acad Sci U S A. 2021 Jan 20;118(4):e2012704118. doi: 10.1073/pnas.2012704118 (PMC7848715; doi:10.1073/pnas.2012704118), 2021-01-20
Supplement: pnas.2012704118.sapp.pdf [file pnas.2012704118.sapp.pdf]

1

## 2 **Supplementary Information for**

### 3 **Rational policymaking during a pandemic**

4 **Loïc Berger, Nicolas Berger, Valentina Bosetti, Itzhak Gilboa, Lars Peter Hansen, Christopher Jarvis, Massimo Marinacci and**  
5 **Richard D. Smith**

6 **Corresponding Authors: Loïc Berger and Lars Peter Hansen.**

7 **E-mail: [l.berger@ieseg.fr](mailto:l.berger@ieseg.fr), [lhansen@uchicago.edu](mailto:lhansen@uchicago.edu)**

#### 8 **This PDF file includes:**

9     Supplementary text

10    Tables S1 to S2

11    SI References

## 12 Supporting Information Text

### 13 Methods supplement to Figure 2: deciding about school closures and their length during COVID-19 pandemic

#### 14 Overview

15 This Appendix supports the case study presented in Figure 2 of the manuscript. Its purpose is to show how decision theory  
16 could be used in a context where distinct model projections exist. Using a simple example of a decision problem of school  
17 closures during the COVID-19 pandemic, we highlight what are the resulting recommendations from different formal decision  
18 rules in terms of policy responses.

19 It is important to note that the decision problem presented in this case study is necessarily simplistic and should be used for  
20 demonstrative purposes only.

#### 21 1. Background

22 **Context** By end of April 2020, 191 countries had implemented national school closures in response to the COVID-19 pandemic  
23 (1). Yet the effectiveness of such a measure is highly uncertain, due to the lack of data on the relative contribution of school  
24 closures to transmission control, and conflicting modelling results (2).

25 **The policymaker's problem** Decisions about closures and their length involve a series of trade-offs. The policy assessment thus  
26 involves weighting benefits and costs of alternative courses of action. On the one hand, school closures can slow the pandemic  
27 and its impact by reducing child-child transmission, thus delaying the pandemic peak that overwhelms health care services,  
28 and therefore ultimately reducing morbidity and associated mortality. If this is the case, such interventions bring clear health  
29 benefits for the society and avoid unsustainable demands on the health system. On the other hand, school closures can have  
30 high direct and indirect health and socio-economic costs. For example, they may increase child-adult transmission, reduce the  
31 ability of healthcare and key workers to work and thus reduce the capacity of healthcare (3, 4). Economic costs of lengthy  
32 school closures are also high (5–7), generated for example through absenteeism by working parents, loss of education, etc.

33 **Uncertainty** The evidence supporting national closure of schools in the COVID-19 pandemic context was very weak. In  
34 particular, evidence of COVID-19 transmission through child-child contact or through schools was not available at the time of  
35 decision (2). As a consequence, it was unclear whether school closures would be effective in the COVID-19 pandemic (4).

36 **Framework** We use a framework that decomposes uncertainty into distinct layers of analysis: (i) uncertainty *within* models  
37 (also called *risk*, *aleatory* uncertainty, or *physical* uncertainty), (ii) uncertainty *across* models (also called *model ambiguity*, or  
38 *model uncertainty*), and (iii) uncertainty *about* models (also called *model misspecification*).\*

39 We consider a general decision problem in which consequences depend on the states of the environment that are viewed as  
40 realizations of an underlying economic or physical generative mechanism (10). A *model* is a probability distribution induced by  
41 such a mechanism. It describes states' variability by combining a structural component based on theoretical knowledge (e.g.  
42 economic or physical) and a random component coming from, for example, measurement errors or minor omitted explanatory  
43 variables (13; 14). We assume that decision makers (DMs) posit a collection of such models. Uncertainty *across* model therefore  
44 results from the uncertainty about the true underlying mechanism: within the posited collection, there is uncertainty about  
45 which model actually governs states' realizations. However, even after a model is specified, there is still uncertainty *within*  
46 model, i.e. about which specific state will actually obtain; this is the notion of *risk* typically considered in economics. Finally,  
47 the third layer of uncertainty (*about* models), arises as the true model might not belong to the posited collection of models,  
48 reflecting the idea that all posited models have an inherent approximate nature.

#### 49 2. Decision making under uncertainty

**A. The structure of a decision problem.** The general problem that a DM, in particular a policymaker, faces is to choose an  
*action*  $a$  within a set  $A$  of possible alternative actions, whose *consequences*  $c \in C$  depend on the realization of a *state of the*  
*environment*  $s \in S$  which is outside the DM's control. The relationship among consequences, actions and states is described by  
a consequence function  $\rho : A \times S \rightarrow C$ , where  $c = \rho(a, s)$  is the consequence of action  $a$  when state  $s$  obtains. DMs have a  
(complete and transitive) *preference relation*  $\succsim$  over actions that describes how they rank the different alternative actions.<sup>†</sup>  
The quintet  $(A, S, C, \rho, \succsim)$  characterizes the decision problem under uncertainty. The aim of the DM is to select the action  $\hat{a}$   
that is *optimal* according to her preference, that is, such that  $\hat{a} \succsim a$  for all actions  $a \in A$ . The preference  $\succsim$  is assumed to  
admit a numerical representation via a *decision criterion*  $V : A \rightarrow \mathbb{R}$ , with

$$a \succsim b \iff V(a) \geq V(b)$$

50 for all actions  $a, b \in A$ . This numerical representation permits to formulate the decision problem as an optimization problem

$$51 \max_a V(a) \quad \text{sub } a \in A. \quad [1]$$

52 Optimal actions  $\hat{a}$  are the solutions of this problem. To find an optimal action thus amounts to solve this optimization problem.

\* See (8–11) for a discussion, and (12) for empirical evidence on the distinction between these layers.

<sup>†</sup> As is usual, we write  $a \succsim b$  if the DM prefers action  $a$  to action  $b$  (i.e., either strictly prefers action  $a$  to action  $b$ ,  $a \succ b$ , or is indifferent between the two,  $a \sim b$ ).

The DM may address, especially in policy problems, state uncertainty through the guise of models. Based on ex ante scientific and socio-economic information, the DM might be able to posit a set of probability models  $M \subseteq \Delta(S)$  describing the likelihoods of the different states. This set of models is taken as a datum of the decision problem, which is now characterized by a sextet  $(A, S, C, \rho, \succ, M)$ . It is often assumed, following (15), that the correct model belongs to the set of models that the DM posits, thus abstracting from model misspecification issues.

**B. Decision criteria.** The form of the decision criterion  $V$  determines the nature of decision problem [1]. Different possible criteria have been proposed in the literature. The ones we consider are: the subjective expected utility (SEU) criterion, which dates back to the seminal works of (15–18), and has recently been revisited by (19) to accommodate explicitly the presence of uncertainty across models; the maxmin criterion of (15); the smooth ambiguity criterion, developed by (20); and the multiple priors criterion proposed by (21). For the sake of brevity, the more general  $\alpha$ -versions of the maxmin criterion (22) and of the multiple priors criterion (23) are only discussed in the main text.

### C. Making decisions in a pandemic.

**C.1. States and consequences.** With the letter  $R$  we denote a rate of contagion within a given population, i.e., the average number of individuals infected per single case. The baseline rate of contagion, denoted by  $R_0$ , is called *basic reproduction number*. It applies to a population never exposed to the virus, where everyone is susceptible,<sup>‡</sup> and depends on the biology of the virus as well as on the natural (pre-pandemic) socio-economic structure that characterizes the population (24). The biology of the virus determines its ability to infect (i.e., the probability of infection per interaction) and the duration of infectiousness.<sup>§</sup> The natural socio-economic structure determines the natural social distancing and, through it, the average number of interactions per individual (25, 26). For instance, natural social distancing might be higher in Northern than in Southern European countries.

These natural factors, biological and socio-economic, determine  $R_0$ . It is the natural, *ex ante*, rate at which the pandemic progresses, without private and public decisions that respond to it. Ex post, after these decisions are put in place and affect the biological and socio-economic factors that determine  $R_0$ , the relevant rate of contagion becomes the *effective reproduction* (or *reproductive*) number  $R_e$  (27). For example, school closure is a public decision that may increase social distancing (a socio-economic factor), while a diligent use of protective gear is a private decision that may decrease the virus ability to infect (a biological factor).

Here we focus on public decisions, policies, and assume that private ones are subsumed by them.<sup>¶</sup> A policy translates a basic reproduction number  $R_0$  into an effective one  $R_e$ . Yet, how this translation occurs often remains uncertain. For instance, evidence on the effectiveness of school closure policies for COVID-19 comes from influenza outbreaks, but the ability of children to transmit the disease greatly varies across coronaviruses (28). For this reason, we represent how a policy  $a$  maps  $R_0$  into  $R_e$  via the relation  $R_e = f(a, R_0, \theta_r, \varepsilon_r)$ , where  $\theta_r$  is a structural parameter and  $\varepsilon_r$  is a shock.<sup>||</sup> We assume that  $\partial f / \partial a \leq 0$  and  $\partial f / \partial R_0 > 0$ . For example, if the relation is linear we have

$$R_e = \theta_{r,1}a + \theta_{r,2}R_0 + \varepsilon_r, \quad [2]$$

with  $\theta_{r,1} \leq 0$  and  $\theta_{r,2} > 0$ .<sup>\*\*</sup> In the baseline scenario without policy intervention – i.e., when  $a = 0$  – the effective reproduction number  $R_e$  is determined by: (i) the natural proportion  $\theta_{r,2}$  of the population that is susceptible, (ii) the basic reproduction number  $R_0$  that summarizes the biological and socio-economic factors previously discussed, (iii) a shock  $\varepsilon_r$  that accounts for minor omitted variables. The economic damage  $D$ , in monetary terms (e.g., loss of GDP)<sup>††</sup>, associated with the pandemic is determined by the rate of contagion  $R_e$  via a function  $D = g(R_e, \theta_d, \varepsilon_d)$ , where  $\theta_d$  is a structural parameter and  $\varepsilon_d$  is a shock. This function represents the ability of health and economic systems to cope with the pandemic. We assume that  $\partial g / \partial R_e > 0$ . For example, assuming a quadratic damage function we have:

$$D = \theta_{d,1}R_e^2 + \theta_{d,2}R_e + \varepsilon_d, \quad [3]$$

with  $2\theta_{d,1}R_e + \theta_{d,2} > 0$ . The economic damage  $D$  associated with a policy  $a$  is then  $D = g(R_e, \theta_d, \varepsilon_d) = g(f(a, R_0, \theta_r, \varepsilon_r), \theta_d, \varepsilon_d)$ . A policy affects, according to relation  $f$ , the effective reproduction number and, through it, determines an economic damage according to relation  $g$ .

In the linear-quadratic example, we have

$$D = \kappa_1 a^2 + \kappa_2 a + \kappa_3, \quad [4]$$

where

$$\kappa_1 = \theta_{d,1}\theta_{r,1}^2 \quad [5]$$

$$\kappa_2 = \theta_{r,1}(2\theta_{d,1}(\theta_{r,2}R_0 + \varepsilon_r) + \theta_{d,2}) \quad [6]$$

$$\kappa_3 = \theta_{d,1}(\theta_{r,2}R_0 + \varepsilon_r)^2 + \theta_{d,2}(\theta_{r,2}R_0 + \varepsilon_r) + \varepsilon_d. \quad [7]$$

<sup>‡</sup> An individual is *susceptible* if has no immune protection against the virus.

<sup>§</sup> By *interaction* we mean a contact amenable to virus transmission (in terms of closeness and duration).

<sup>¶</sup> A highly non-trivial assumption that, for instance, requires people to use diligently protective gear if asked by local or national authorities.

<sup>||</sup> Throughout, shocks have zero mean and unit variance.

<sup>\*\*</sup> For simplicity, we allow  $R_e$  to be negative (otherwise, we should add constraints that preserve the positivity of  $R_e$ , something that we prefer to abstract from).

<sup>††</sup> The scalar  $D$  lumps together economic consequences and health effects (through a monetary measure, e.g. GDP loss). Yet, in principle  $D$  may be a multidimensional vector with different components, say health and economic ones, that the decision criterion then trades off.

Policy  $a$  has an uncertain implementation cost  $C$  that, for instance, for school closures includes, as previously mentioned, absenteeism by working parents and loss of education. This cost is represented by a function  $C = h(a, \theta_c, \varepsilon_c)$ . We assume that costs grow more than proportionally, so that  $\partial h / \partial a > 0$  and  $\partial^2 h / \partial a^2 > 0$  (e.g., the cost of school closures grows more than proportionally with its duration). For example, a quadratic cost function is

$$C = \theta_{c,1} a^2 + \theta_{c,2} a + \varepsilon_c, \quad [8]$$

with  $2\theta_{c,1} a + \theta_{c,2} > 0$  and  $\theta_{c,1} > 0$ . We also assume that the policymaker knows the functional forms of the relations  $f$ ,  $g$  and  $h$  (e.g., whether they are linear or quadratic) but not their structural parameters. This lack of knowledge, along with that of the basic reproduction number  $R_0$  and of the shocks' value  $\varepsilon$ , prevents the DM to know the actions' consequences. States thus have the form  $s = (R_0, \varepsilon, \theta) \in S$  with both random and structural components. In particular, the vector  $\varepsilon = (\varepsilon_r, \varepsilon_d, \varepsilon_c) \in E$  represents the shocks affecting the health and economic systems, while the vector  $\theta = (\theta_r, \theta_d, \theta_c) \in \Theta$  specifies the structural coefficients parametrizing a model population. If we denote by  $B = -D$  the benefit of policy  $a$  as its ability to reduce the economic damages due to the pandemic, its consequence is the difference  $B - C$  between its benefits and costs. The consequence function is then  $\rho(a, \varepsilon, \theta) = -g(f(a, R_0, \theta_r, \varepsilon_r), \theta_d, \varepsilon_d) - h(a, \theta_c, \varepsilon_c)$ . In the linear-quadratic example, it becomes

$$\rho(a, \varepsilon, \theta) = -(\kappa_1 + \theta_{c,1}) a^2 - (\kappa_2 + \theta_{c,2}) a - \kappa_3 + \varepsilon_c$$

**C.2. Models and beliefs.** Shocks have the form  $\varepsilon_r = \sigma_r w_r$ ;  $\varepsilon_d = \sigma_d w_d$ ;  $\varepsilon_c = \sigma_c w_c$ , where  $w_r$ ,  $w_d$  and  $w_c$  are uncorrelated “white noises” with zero mean and unit variance. The vector parameter  $\sigma = (\sigma_r, \sigma_d, \sigma_c) \in \Sigma$  then specifies the standard deviations of shocks. To ease the analysis, we assume that their distribution  $q_\sigma$  is known, up to their standard deviations  $\sigma$ . We also assume that the distribution  $p_\xi$  of the rate  $R_0$  is indexed by a parameter  $\xi \in \Xi$  that accounts for different epidemiological views on the quantification of the basic reproduction number. With this, the positive scalar  $m(\varepsilon, \theta, R_0)$  gives the joint probability of shock  $\varepsilon$ , parameter  $\theta$  and rate  $R_0$  under a posited model  $m \in M$ . We adopt the model factorization  $m = q_\sigma \times \delta_\theta \times p_\xi$ , that is,<sup>††</sup>

$$m(\varepsilon, \theta', R_0) = \begin{cases} q_\sigma(\varepsilon) p_\xi(R_0) & \text{if } \theta' = \theta \\ 0 & \text{else} \end{cases} \quad [9]$$

where  $q_\sigma(\varepsilon)$  is the probability of shock  $\varepsilon$  under the standard deviation specification  $\sigma$ , while  $p_\xi(R_0)$  is the probability that  $R_0$  is the basic reproduction number according to epidemiological view  $\xi$ . We can thus index models as  $m_{\theta, \sigma, \xi} = q_\sigma \times \delta_\theta \times p_\xi$  and denote by  $M = \{m_{\theta, \sigma, \xi}\}$  the set of models that the policymaker posits. Because of the factorization, the policymaker's subjective belief  $\mu(m)$  that  $m$  is the correct model is actually over the values of  $\theta$ ,  $\sigma$  and  $\xi$  and so has the form  $\mu(\theta, \sigma, \xi)$ . A convenient separable form is, with an abuse of notation,  $\mu(\theta, \xi) = \mu(\theta, \sigma) \mu(\xi)$ .

For example, consider the pandemic decision problem  $(A, S, C, \rho, \succ, M)$  and the set of models  $M = \{m_{\theta, \sigma, \xi}\}$  that the policymaker posits. Assume that a von Neumann-Morgenstern utility function  $u : C \rightarrow \mathbb{R}$  translates economic consequences, measured in monetary terms, into utility levels. This function captures attitudes toward risk (i.e. uncertainty within models). The *expected reward* of action  $a$  under model  $m \in M$  is

$$\begin{aligned} R(a, \theta, \sigma, \xi) &= \sum_{\varepsilon, R_0} u(\rho(a, \theta, \varepsilon, R_0)) m_{\theta, \sigma, \xi}(\varepsilon, R_0) \\ &= \sum_{\varepsilon, R_0} u(\rho(a, \theta, \varepsilon, R_0)) q_\sigma(\varepsilon) p_\xi(R_0). \end{aligned}$$

**D. Numerical example.** In the case study presented in Figure 2 of the manuscript, the policymaker must decide whether to and how long to close school for. Closing schools is costly (e.g. it increases child-adult transmission, reduces the ability of healthcare and key workers to work and the capacity of healthcare, generates economic costs through absenteeism by working parents, loss of education, etc.), but it helps slow the pandemic and its impact by reducing child-child transmission, thus delaying the pandemic peak that overwhelms health care services, and therefore ultimately reducing morbidity and associated mortality.

Here, we illustrate how different decision rules may be used in this specific example, in which there is only structural uncertainty about the benefits of school closures. The cost function is assumed to be known, so that there are only three different models in the set  $M$ .

- **Model 1** is based on the evidence coming from influenza outbreaks, for which the majority of transmission is between children (29). According to this model, closing schools would be the biggest contributor to reducing  $R_e$  to below 1 and it may be the only intervention that could do so. In this case the benefit would, for example, be proportional to the duration of school closure. In the linear-quadratic example, this would imply that  $\kappa_1 = 0$  and  $\kappa_2 < 0$ , so that benefits positively depend on the action  $a$ : stronger measures reduce the effective reproductive number  $R_e$ , and thus the economic damage  $D$  of the pandemic.
- **Model 2**, instead, relies on some previous coronavirus outbreaks, for which evidence suggests minimal transmission between children (28). In this case,  $R_e$  cannot be reduced below 1, school closures do not affect the size of the epidemic, and therefore do not bring any benefits. This is for example the case if  $\kappa_1 = \kappa_2 = 0$  in the linear-quadratic setup, so that the economic damages, and thus the benefits, are unaffected by the policy action  $a$ .

<sup>††</sup>Here  $\delta_\theta$  is the probability distribution concentrated on  $\theta$ , i.e.,  $\delta_\theta(\theta) = 1$  and  $\delta_\theta(\theta') = 0$  if  $\theta' \neq \theta$ .

143 • **Model 3** projects that some child to child transmission happens so that closing schools contributes to reducing  $R_e$  to  
 144 below 1 and reduces the size of the epidemic. However, this only works in combination with other measures (30). Without  
 145 it,  $R_e$  would be above 1 but as an isolated measure school closures do not have such a big effect (31). Under this scenario,  
 146 the effectiveness of school closures is important at the beginning, but declines as time goes on. In the linear-quadratic  
 147 example, this would imply that  $\kappa_1 > 0$  and  $\kappa_2 < 0$ .

148 For simplicity, we assume that there is no uncertainty within models ( $\varepsilon_r = \varepsilon_d = \varepsilon_c = 0$ ).

149 The illustrative benefit and cost functions we used are the following:

- 150 •  $B(a) = 4a + 20$  in the case of model 1,
- 151 •  $B(a) = 100$  in the case of model 2,
- 152 •  $B(a) = -0.1a^2 + 4a + 70$  in the case of model 3,
- 153 •  $C(a) = 0.1a^2 + 10$ .

154 Consider the decision problem  $(A, S, C, \rho, \zeta, M)$ . In our case, we restrict the action space so that  $A = [0, 20]$ . For each of  
 155 these 3 models  $m_{\theta, \sigma, \xi}$ , it is possible to compute the expected reward  $R(a, \theta, \sigma, \xi)$  associated with a school closure policy. The  
 156 policymaker, however, does not know which is the correct one. The expected reward is, in that sense, itself uncertain because  
 157 it depends on the values of the different structural parameters used. For each particular model representing the net overall  
 158 monetary benefits of the school closure policy, it is possible to determine the optimal action to put in place. Table S1 presents  
 159 the expected rewards, together with their associated optimal actions  $\hat{a}$  in the case of linear utility  $u$ .

**Table S1. Example of expected rewards and their associated optimal actions with linear utility  $u$**

|         | $R(a, \theta, \sigma, \xi)$ | $\hat{a}$ |
|---------|-----------------------------|-----------|
| Model 1 | $-0.1a^2 + 4a + 10$         | 20        |
| Model 2 | $-0.1a^2 + 90$              | 0         |
| Model 3 | $-0.2a^2 + 4a + 60$         | 10        |

160 If the policymaker considers uncertainty within and across models in the same way, she aggregates the expected rewards by  
 161 taking a weighted average over them, where the weights represent the degrees of belief in each specific model. The decision  
 162 criterion in this case is the classical SEU criterion of (17). For example, under a uniform prior over the possible models, i.e. if  
 163  $\mu(m) = 1/3$  for all  $m$ , the optimal decision is a school closure policy  $\hat{a}_{seu} = 10$ . It therefore means that, putting the same  
 164 weight on the three different models given by three different sources, or a single model (such as model 3) on which all experts  
 165 would agree, would lead exactly to the same optimal school closure policy. Instead, if the policymaker decides to behave  
 166 extremely precautionary by taking into account only the model providing the lowest expected reward, she only considers Model  
 167 1 and decides to close schools for the maximum length  $\hat{a}_{mxxm} = 20$ . This policymaker is extremely averse to uncertainty across  
 168 models, and in consequence, uses the maxmin decision rule of (15). Alternatively, if the policymaker is averse to uncertainty in  
 169 the sense of disliking more uncertainty across than within models but is not as precautionary as a maxmin policymaker, she  
 170 may follow the smooth ambiguity criterion of (20). In such a case, the optimal length of school closures is longer than under  
 171 expected utility. It approximately corresponds to 12, when the ambiguity function  $\phi$  is logarithmic. Finally, if the policymaker  
 172 has multiple prior probability measures over the models, she can compute the expected utility for each of them, and considers  
 173 only the one providing the lowest level of subjective expected utility. For example, imagine two distinct priors: the uniform  
 174 prior, in which the 3 models are weighted equally, and the prior that considers model 2 as implausible, but models 1 and 3 as  
 175 equally likely (i.e., this prior puts a weight 0 on model 2 and a weight 0.5 over the two other models). The optimal length  
 176 of school closures under the multiple priors model of (21) in this situation is higher than under subjective expected utility.  
 177 It corresponds to closing schools for approximately 13 weeks. Table S2 summarizes the optimal decisions for each of these  
 178 decision rules.

**Table S2. Example of optimal policies depending on the decision rules followed**

| Decision rules (criterion) | Optimal policy          |
|----------------------------|-------------------------|
| $V_{seu}$                  | $\hat{a}_{seu} = 10$    |
| $V_{mxxm}$                 | $\hat{a}_{mxxm} = 20$   |
| $V_{smt}$                  | $\hat{a}_{smt} = 11.65$ |
| $V_{mp}$                   | $\hat{a}_{mp} = 13.33$  |

179

## References

1. United Nations Educational Scientific and Cultural Organization. Covid-19 educational disruption and response. <https://en.unesco.org/themes/education-emergencies/coronavirus-school-closures>, 2020. [Online; accessed April 24, 2020].
2. Russell M Viner, Simon J Russell, Helen Croker, Jessica Packer, Joseph Ward, Claire Stansfield, Oliver Mytton, Chris Bonell, and Robert Booy. School closure and management practices during coronavirus outbreaks including covid-19: a rapid systematic review. *The Lancet Child & Adolescent Health*, 2020.
3. Samantha K Brooks, Louise E Smith, Rebecca K Webster, Dale Weston, Lisa Woodland, Ian Hall, and G James Rubin. The impact of unplanned school closure on children’s social contact: rapid evidence review. *Eurosurveillance*, 25(13):2000188, 2020.
4. Jude Bayham and Eli P Fenichel. Impact of school closures for covid-19 on the us health-care workforce and net mortality: a modelling study. *The Lancet Public Health*, 2020.
5. Md Z Sadique, Elisabeth J Adams, and William J Edmunds. Estimating the costs of school closure for mitigating an influenza pandemic. *BMC public health*, 8(1):135, 2008.
6. Howard Lempel, Joshua M Epstein, and Ross A Hammond. Economic cost and health care workforce effects of school closures in the us. *PLoS currents*, 1, 2009.
7. Richard D. Smith, Marcus R. Keogh-Brown, and Tony Barnett. Estimating the economic impact of pandemic influenza: An application of the computable general equilibrium model to the uk. *Social Science & Medicine*, 73(2):235–244, 2011. .
8. Kenneth J Arrow. Alternative approaches to the theory of choice in risk-taking situations. *Econometrica*, 19:404–437, 1951.
9. Lars Peter Hansen. Nobel lecture: Uncertainty outside and inside economic models. *Journal of Political Economy*, 122(5):945–987, 2014.
10. Massimo Marinacci. Model uncertainty. *Journal of the European Economic Association*, 13(6):1022–1100, 2015. ISSN 1542-4774. . URL <http://dx.doi.org/10.1111/jeea.12164>.
11. Lars Peter Hansen and Massimo Marinacci. Ambiguity aversion and model misspecification: An economic perspective. *Statistical Science*, 31:511–515, 2016.
12. Ilke Aydogan, Loïc Berger, Valentina Bosetti, and Ning Liu. Three layers of uncertainty and the role of model misspecification: an experiment. IGER Working Paper 623, Bocconi University, 2018.
13. Tjalling C Koopmans. Measurement without theory. *The Review of Economics and Statistics*, 29(3):161–172, 1947.
14. Jacob Marschak. Economic measurements for policy and prediction. In *Studies in Econometric Method* (W. Hood and T. J. Koopmans, eds.), pages 1–26. Wiley, New York, 1953.
15. A. Wald. *Statistical decision functions*. John Wiley & Sons, New York, 1950.
16. John von Neumann and Oskar Morgenstern. *Theory of Games and Economic Behavior*. 2nd ed. Princeton University Press, 1947.
17. L.J. Savage. *The Foundations of Statistics*. J. Wiley, New York, 1954. second revised edition, 1972.
18. Jacob Marschak and Roy Radner. *Economic theory of teams*. Yale University Press, New Haven, 1972.
19. Simone Cerreia-Vioglio, Fabio Maccheroni, Massimo Marinacci, and Luigi Montrucchio. Classical subjective expected utility. *Proceedings of the National Academy of Sciences*, 110(17):6754–6759, 2013.
20. P. Klibanoff, M. Marinacci, and S. Mukerji. A smooth model of decision making under ambiguity. *Econometrica*, 73:1849–1892, 2005.
21. I. Gilboa and D. Schmeidler. Maxmin expected utility with a non-unique prior. *Journal of Mathematical Economics*, 18(2):141–154, 1989.
22. Leonid Hurwicz. Some specification problems and applications to econometric models. *Econometrica*, 19(3):343–344, 1951.
23. Paolo Ghirardato, Fabio Maccheroni, and Massimo Marinacci. Differentiating ambiguity and ambiguity attitude. *Journal of Economic Theory*, 118(2):133–173, 2004.
24. Ta-Chou Ng and Tzai-Hung Wen. Spatially adjusted time-varying reproductive numbers: Understanding the geographical expansion of urban dengue outbreaks. *Scientific Reports*, 9(1):1–12, 2019.
25. Klaus Dietz. The estimation of the basic reproduction number for infectious diseases. *Statistical methods in medical research*, 2(1):23–41, 1993.
26. Paul L Delamater, Erica J Street, Timothy F Leslie, Y Tony Yang, and Kathryn H Jacobsen. Complexity of the basic reproduction number ( $r_0$ ). *Emerging infectious diseases*, 25(1):1, 2019.
27. Jacco Wallinga and Marc Lipsitch. How generation intervals shape the relationship between growth rates and reproductive numbers. *Proceedings of the Royal Society B: Biological Sciences*, 274(1609):599–604, 2007.
28. Gary WK Wong, Albert M Li, PC Ng, and Tai F Fok. Severe acute respiratory syndrome in children. *Pediatric pulmonology*, 36(4):261–266, 2003.
29. P Mangtani et al. Impact of school closures on an influenza pandemic: Scientific evidence base review. 2014.
30. Kiesha Prem, Yang Liu, Timothy W Russell, Adam J Kucharski, Rosalind M Eggo, Nicholas Davies, Stefan Flasche, Samuel Clifford, Carl AB Pearson, James D Munday, et al. The effect of control strategies to reduce social mixing on outcomes of the covid-19 epidemic in wuhan, china: a modelling study. *The Lancet Public Health*, 2020.
31. Neil Ferguson, Daniel Laydon, Gemma Nedjati Gilani, Natsuko Imai, Kylie Ainslie, Marc Baguelin, Sangeeta Bhatia, Adhiratha Boonyasiri, ZULMA Cucunuba Perez, Gina Cuomo-Dannenburg, et al. Report 9: Impact of non-pharmaceutical interventions (npis) to reduce covid19 mortality and healthcare demand. 2020.
